# Supplementary material
Source: PubMed Central journal article supplement (PMC6922028)
Supplement: NIHMS1523348-supplement-1.pdf [file NIHMS1523348-supplement-1.pdf]

**Supplement 1: Relevant Assays**

| <b>Assay</b>  | <b>Method/Instrument</b>             | <b>Manufacturer</b>                            | <b>Normal Range</b> |
|---------------|--------------------------------------|------------------------------------------------|---------------------|
| Acetoacetate  | colorimetric                         | Abcam (Cambridge, MA)                          | 0.049-0.294umol/ml  |
| Adiponectin   | RIA                                  | Millipore (Billerica, MA)                      | 559-7271ng/mL       |
| B-OHB         | colorimetric                         | Cayman Chemical (Ann Arbor, MI)                | 0.02-1.5mM          |
| Cholesterol   |                                      |                                                |                     |
| Total         | colorimetric/Cobas Integra 400 Plus  | Roche Diagnostics (Indianapolis, IN)           | <201 mg/dl          |
| HDL           |                                      |                                                | >55 mg/dl           |
| LDL           |                                      |                                                | <100 mg/dl          |
| Triglycerides |                                      |                                                | <200 mg/dl          |
| Cortisol      | Immulate 1000                        | Siemens Healthcare Diagnostics (Deerfield, IL) | 5-25 ug/dL (am)     |
| CRP (hs)      | turbidimetric/Cobas Integra 400 Plus | Roche Diagnostics (Indianapolis, IN)           | <5.0mg/L            |
| FFA           | colorimetric                         | Wako Diagnostics (Mountain View, CA)           | 0.1-0.6mEq/L        |
| FGF 21        | ELISA                                | R&D Systems (Minneapolis, MN)                  | ND-914pg/ml         |
| Glucagon      | ELISA                                | R&D Systems (Minneapolis, MN)                  | ND-224pg/ml         |
| Glucose       | colorimetric/Cobas Integra 400 Plus  | Roche Diagnostics (Indianapolis, IN)           | 74-109 mg/dL        |
| Glycerol      | colorimetric                         | Cayman Chemical (Ann Arbor, MI)                | 0.12-0.61mg/dL      |
| IL-6          | ELISA                                | R&D Systems (Minneapolis, MN)                  | 0.447-9.96 pg/mL    |
| Insulin       | Immulate 1000                        | Siemens Healthcare Diagnostics (Deerfield, IL) | 8.9-28.4 uIU/mL     |
| Leptin        | RIA                                  | Millipore (Billerica, MA)                      | 2-11.1ng/ml         |
| PYY           | RIA                                  | Millipore (Billerica, MA)                      |                     |
| TNF-alpha     | ELISA                                | R&D Systems (Minneapolis, MN)                  | 0.550-2.816pg/ml    |

**Supplement 2: Correlational Analyses**

Analyses of the relationship of background diet and MMT meal type on the relationship of fasting measures of insulin sensitivity to measures derived from the MMT were made by multiple linear regression analysis in which the dynamic (MMT-derived) measure was the dependent variable and the fasting measures, diet type and meal type were each treated as dichotomous variables. Across dietary/meal combinations we found highly significant correlations of fasting and dynamic indices of insulin-sensitivity and FFA-flux, but not insulin secretion. To our knowledge, this is the first study to compare the utility of fasting and dynamic measures of these variables in subjects ingesting a ketogenic diet. The differences between conclusions regarding effects of dietary macronutrients on fuel homeostasis derived from fasting vs. MMT measures suggest that extrapolations of fasting to post-prandial measures of insulin-mediated glucose disposal are dependent on both current diet and acute meal type.

|                             |                | <b>Fasting Indices</b> |               | Insulin Secretion:          |                            | Glycemic Insulin Sensitivity(fasting): |                          | FFA-flux Insulin Sensitivity |
|-----------------------------|----------------|------------------------|---------------|-----------------------------|----------------------------|----------------------------------------|--------------------------|------------------------------|
|                             |                |                        |               | HOMA- $\beta$ (fasting)     |                            | HOMA-IR                                | Belfiore <sub>FAST</sub> | ADIPO-IR                     |
| <b>MMT-derived Measures</b> |                | Insulinogenic          | ISSI-2        | Belfiore <sub>AUCins</sub>  | Belfiore <sub>AUCins</sub> | Belfiore <sub>FFA</sub>                |                          |                              |
| All Measures                |                | R=0.18, N.S.           | R=0.01, N.S.  | <b>R=-0.46, P&lt;0.001*</b> | <b>R=0.64, P&lt;0.001†</b> | <b>R=-0.69, P&lt;0.001</b>             |                          |                              |
| Baseline Diet               | Baseline Meal  | R=-0.07, N.S.          | R=0.19, N.S.  | <b>R=-0.82, P&lt;0.001</b>  | <b>R=0.79, P&lt;0.001</b>  | <b>R=-0.75, P&lt;0.001</b>             |                          |                              |
|                             | Ketogenic Meal | R=-0.10, N.S.          | R=0.06, N.S.  | <b>R=-0.76, P&lt;0.001</b>  | <b>R=0.79, P&lt;0.001</b>  | <b>R=-0.75, P&lt;0.001</b>             |                          |                              |
| Ketogenic Diet              | Baseline Meal  | <b>R=0.49, P=0.042</b> | R=-0.07, N.S. | <b>R=-0.76, P&lt;0.001</b>  | <b>R=0.62, P=0.008</b>     | <b>R=-0.72, P=0.0012</b>               |                          |                              |
|                             | Ketogenic Meal | R=-0.23, N.S.          | R=0.04, N.S.  | <b>R=-0.57, P=0.016</b>     | <b>R=0.76, P&lt;0.001</b>  | <b>R=-0.55, P=0.005</b>                |                          |                              |
